# Supplementary material
Source: publisher site journal article supplement (https://www.dovepress.com/article/560947)
Supplement: Supplementary file 1 [file 560947%20Revised%20Supplementary%20Material.docx]

**Supplementary table 1** The comparison in the testing cohort and the external validation cohort in terms of the baseline characteristics and independent risk factors.

| **Variables** | **Testing cohort**  **(n=167)** | **External validation**  **Cohort (n=101)** | **Z/χ2** | ***P* Value** |
| --- | --- | --- | --- | --- |
| Male gender | 118(70.7%) | 69(68.3%) | 0.164 | 0.686 |
| Age at diagnosis (months) | 21(11,36) | 41(16,68.5) | -4.208 | <0.001 |
| BMI (kg/m2) | 15.6(14.6,16.8) | 15.4(14.4,16.7) | -0.652 | 0.514 |
| Proportion of incomplete KD | 119(71.3%) | 61 (60.4%) | 3.367 | 0.067 |
| Proportion of fever days lasting over ten | 99(59.3%) | 50(49.5%) | 2.437 | 0.119 |
| Proportion of IVIG-refractory cases | 44(26.3%) | 30(29.7%) | 0.355 | 0.552 |
| Classification of CAA |  |  | 4.545 | 0.103 |
| SCAA | 119(71.3%) | 82(81.2%) |  |  |
| MCAA | 35(21.0%) | 11(10.9%) |  |  |
| GCAA | 13(7.8%) | 8(7.9%) |  |  |
| CAA regression at one year | 120(71.9%) | 67(66.3%) | 0.909 | 0.340 |
| CAA regression at two years | 136(81.4%) | 81(80.2%) | 0.063 | 0.802 |
| CAA regression at three years | 144(86.2%) | 90(89.1%) | 0.472 | 0.492 |
| PLT (×1012/L) | 388.6(266.1,519.5) | 382.0(300.0,519.5) | -0.318 | 0.751 |
| Fib(g/L) | 4.4(3.4,5.0) | 4.3(3.1,5.0) | -1.467 | 0.142 |

Abbreviations: BMI, body mass index; KD, Kawasaki disease; IVIG, intravenous immunoglobulin; CAA, coronary artery aneurysm; SCAA, small - sized CAA; MCAA, medium - sized CAA; GCAA, giant - sized CAA; PLT, platelet count; Fib, Fibrinogen

**Supplementary table 2** The collinearity diagnostic analysis of factors in multivariate Cox regression analysis for predicting the regression of CAA in children with KD

| **Variables** | **Tolerance** | **VIF** |
| --- | --- | --- |
| Age at diagnosis (months) | 0.952 | 1.05 |
| Fever duration | 0.775 | 1.29 |
| Response to IVIG | 0.826 | 1.211 |
| Classification of CAA | 0.86 | 1.163 |
| WBC | 0.692 | 1.445 |
| PLT | 0.756 | 1.323 |
| CRP | 0.644 | 1.552 |
| ESR | 0.631 | 1.584 |
| Fib | 0.705 | 1.418 |

Abbreviations: IVIG, intravenous immunoglobulin; CAA, coronary artery aneurysm; VIF: Variance Inflation Factor; WBC, white blood cell count; PLT, platelet count; CRP, C-reactive protein; ESR, erythrocyte sedimentation rate; Fib, Fibrinogen.

**Supplementary table 3** The percentage of variables with missing data included in the initial dataset

| **Variables** | **Missing data percentage** | | |
| --- | --- | --- | --- |
| **The derivation**  **cohort(n=557)** | **External validation**  **Cohort (n=101)** | |
| ESR | 39(7.0%) | | 6(5.9%) |
| Na+ | 11(2.0%) | | 12(11.9%) |
| ALT | 5(0.9%) | | 4(4.0%) |
| AST | 5(0.9%) | | 4(4.0%) |
| ALB | 5(0.9%) | | 5(5.0%) |
| GLB | 5(0.9%) | | 5(5.0%) |
| Fib | 107(19.2%) | | 12(11.9%) |

Abbreviations: ESR, erythrocyte sedimentation rate; Na+, sodium concentrations; ALT, alanine aminotransferase; AST, aspartate aminotransferase; ALB, serum albumin; GLB, globulin; Fib, Fibrinogen.
